# Supplementary material for: Effects of Arctic sea-ice concentration on surface radiative fluxes in four atmospheric reanalyses
Source: Copernicus journal article supplement (doi:10.5194/egusphere-2024-1759), 2024-06-20
Supplement: Supplementary file 1 [file egusphere-2024-1759-supplement.pdf]

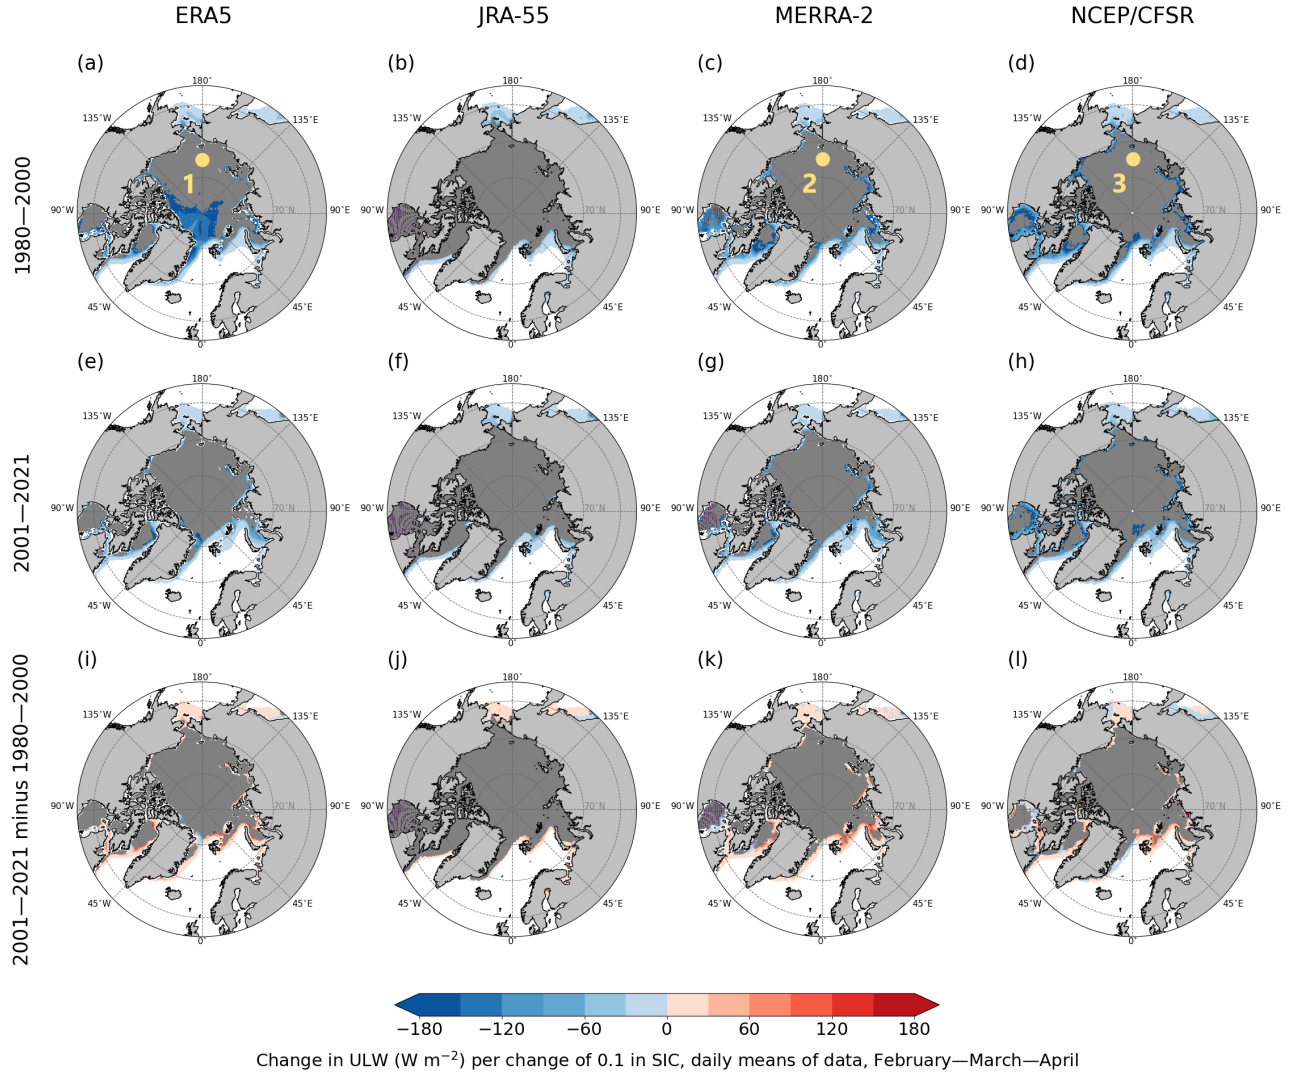

**Figure S 1:** Change in upward longwave radiative flux ( $\text{W m}^{-2}$ ) per change of 0.1 in sea-ice concentration (slope of regression line) in the marine Arctic in February–March–April in four reanalyses (columns), based on the linear orthogonal-distance-regression (ODR) model. Dark grey indicates areas where the ODR model did not converge; in panels (i)–(l), dark grey shows these areas in 1980–2000 and/or 2001–2021. Only grid cells with a mean of SIC > 0.5 were considered, and only the slopes whose 95 % confidence intervals do not overlap zero are shown (others masked in white). Points 1, 2, 3 (in yellow) from panels (a), (c), (d) are further analysed in Figure S2.

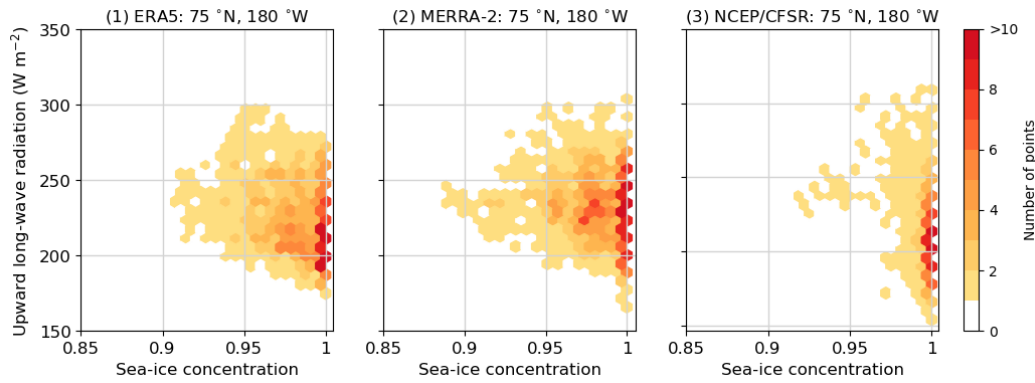

**Figure S 2:** Daily sea-ice concentration and upward long-wave radiative flux in selected grid cells on the border of Chukchi and East Siberian seas, where the orthogonal-distance-regression model did not converge. Data from ERA5 (1), MERRA-2 (2), and NCEP/CFSR (3) (as indicated in Figure S1 in panels (a), (c), (d)), grid cells nearest to 75° N, 180° E, days in February–March–April 1980–2000 (1875 days).

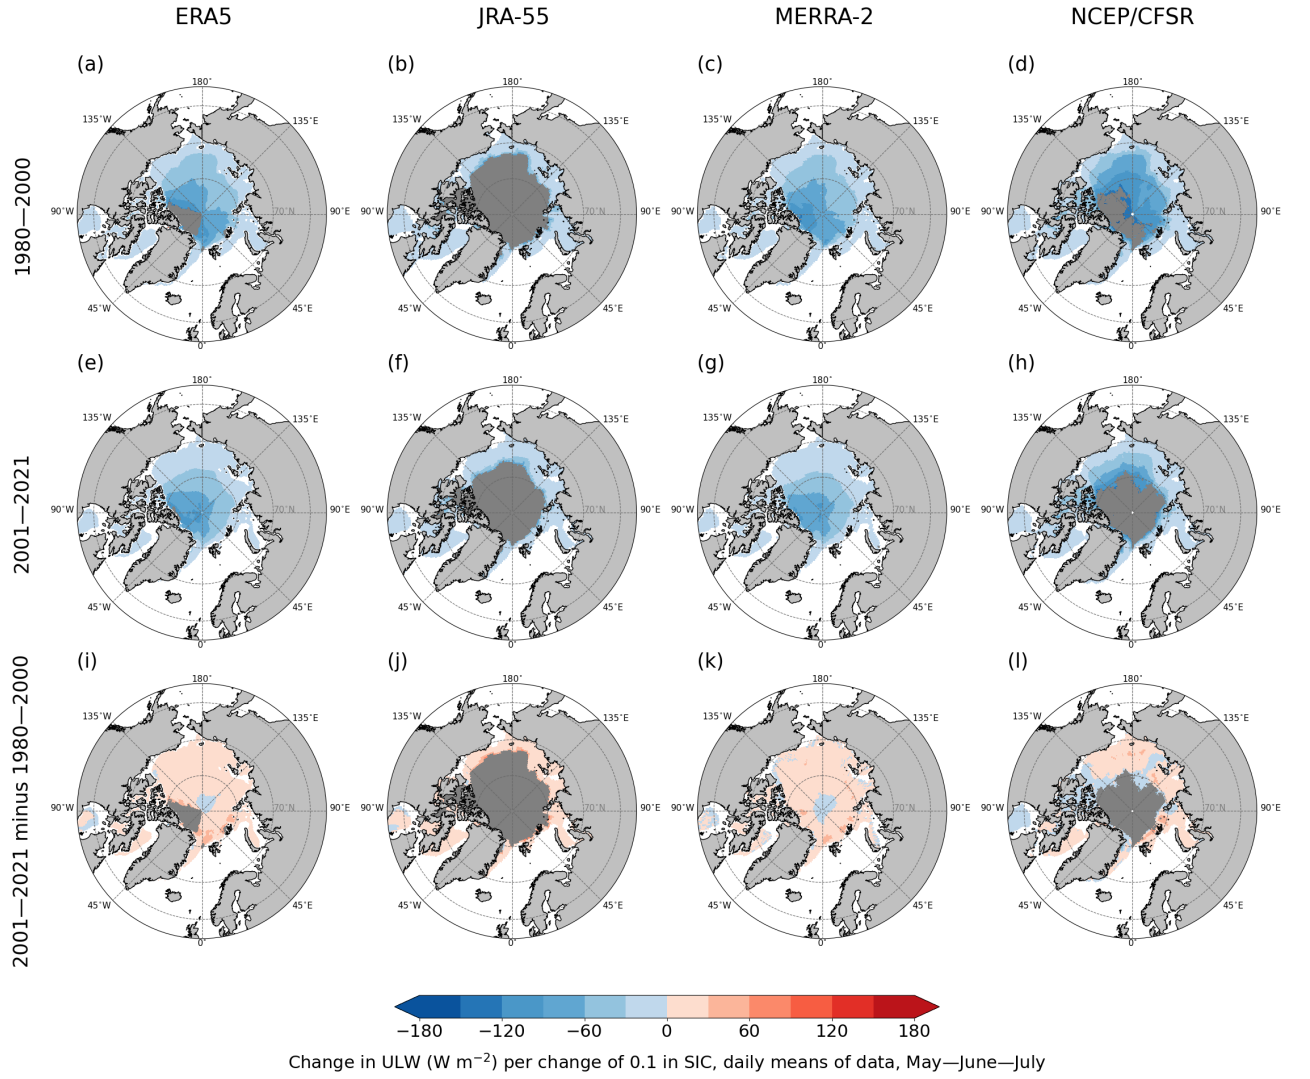

**Figure S 3:** Change in upward longwave radiative flux ( $\text{W m}^{-2}$ ) per change of 0.1 in sea-ice concentration (slope of regression line) in the marine Arctic in May–June–July in four reanalyses (columns), based on the linear orthogonal-distance-regression (ODR) model. Dark grey indicates areas where the ODR model did not converge; in panels (i)–(l), dark grey shows these areas in 1980–2000 and/or 2001–2021. Only grid cells with a mean of SIC > 0.5 were considered, and only the slopes whose 95 % confidence intervals do not overlap zero are shown (others masked in white).

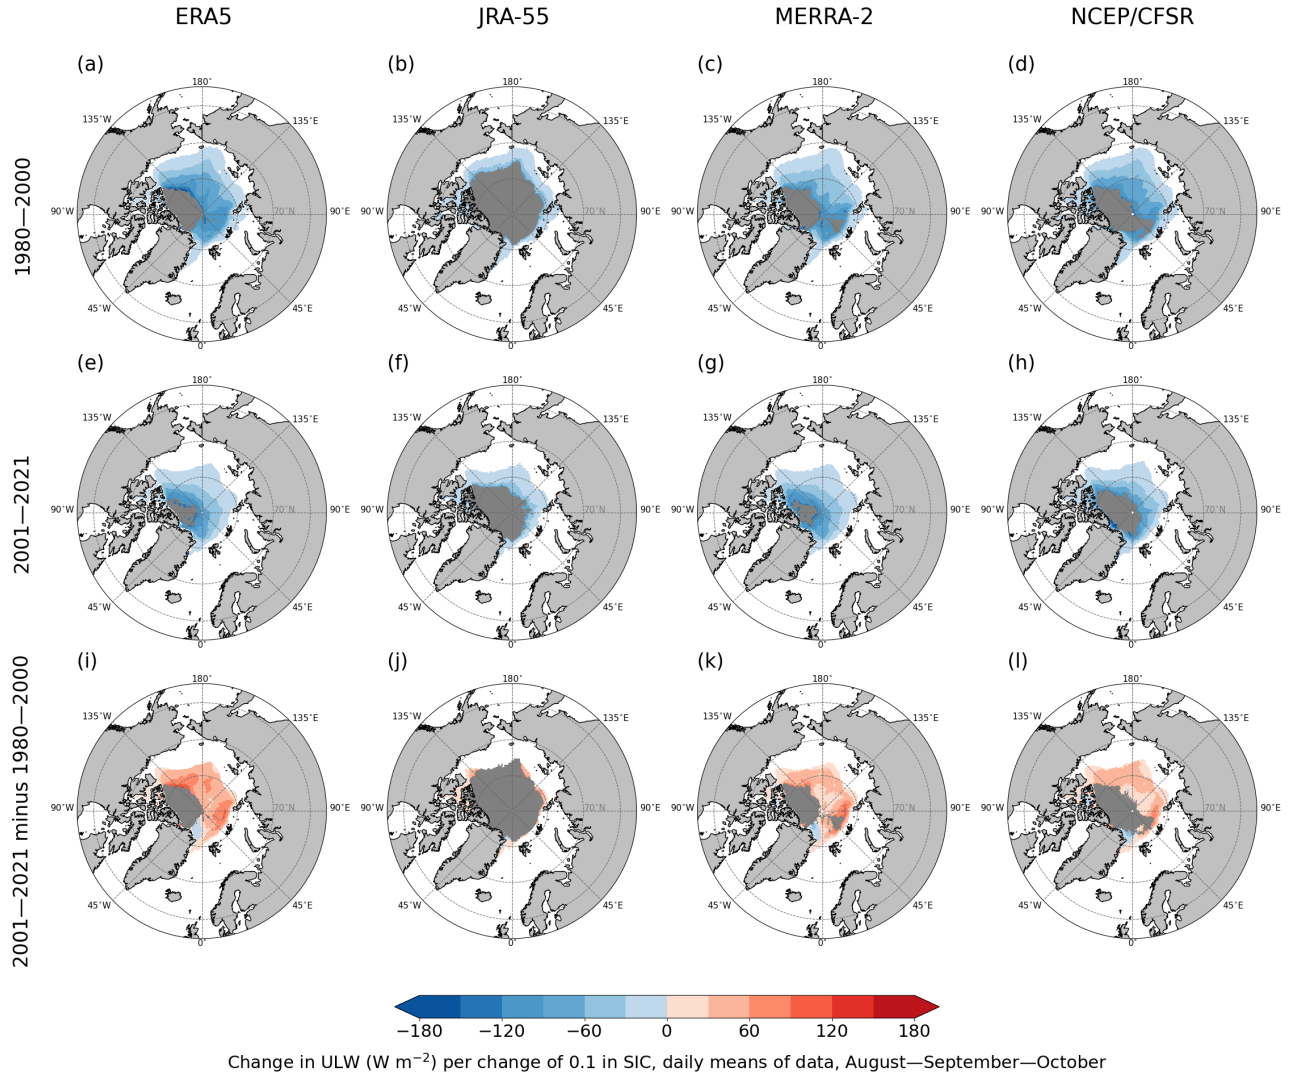

**Figure S 4:** Change in upward longwave radiative flux ( $\text{W m}^{-2}$ ) per change of 0.1 in sea-ice concentration (slope of regression line) in the marine Arctic in August–September–October in four reanalyses (columns), based on the linear orthogonal-distance-regression (ODR) model. Dark grey indicates areas where the ODR model did not converge; in panels (i)–(l), dark grey shows these areas in 1980–2000 and/or 2001–2021. Only grid cells with a mean of SIC > 0.5 were considered, and only the slopes whose 95 % confidence intervals do not overlap zero are shown (others masked in white).

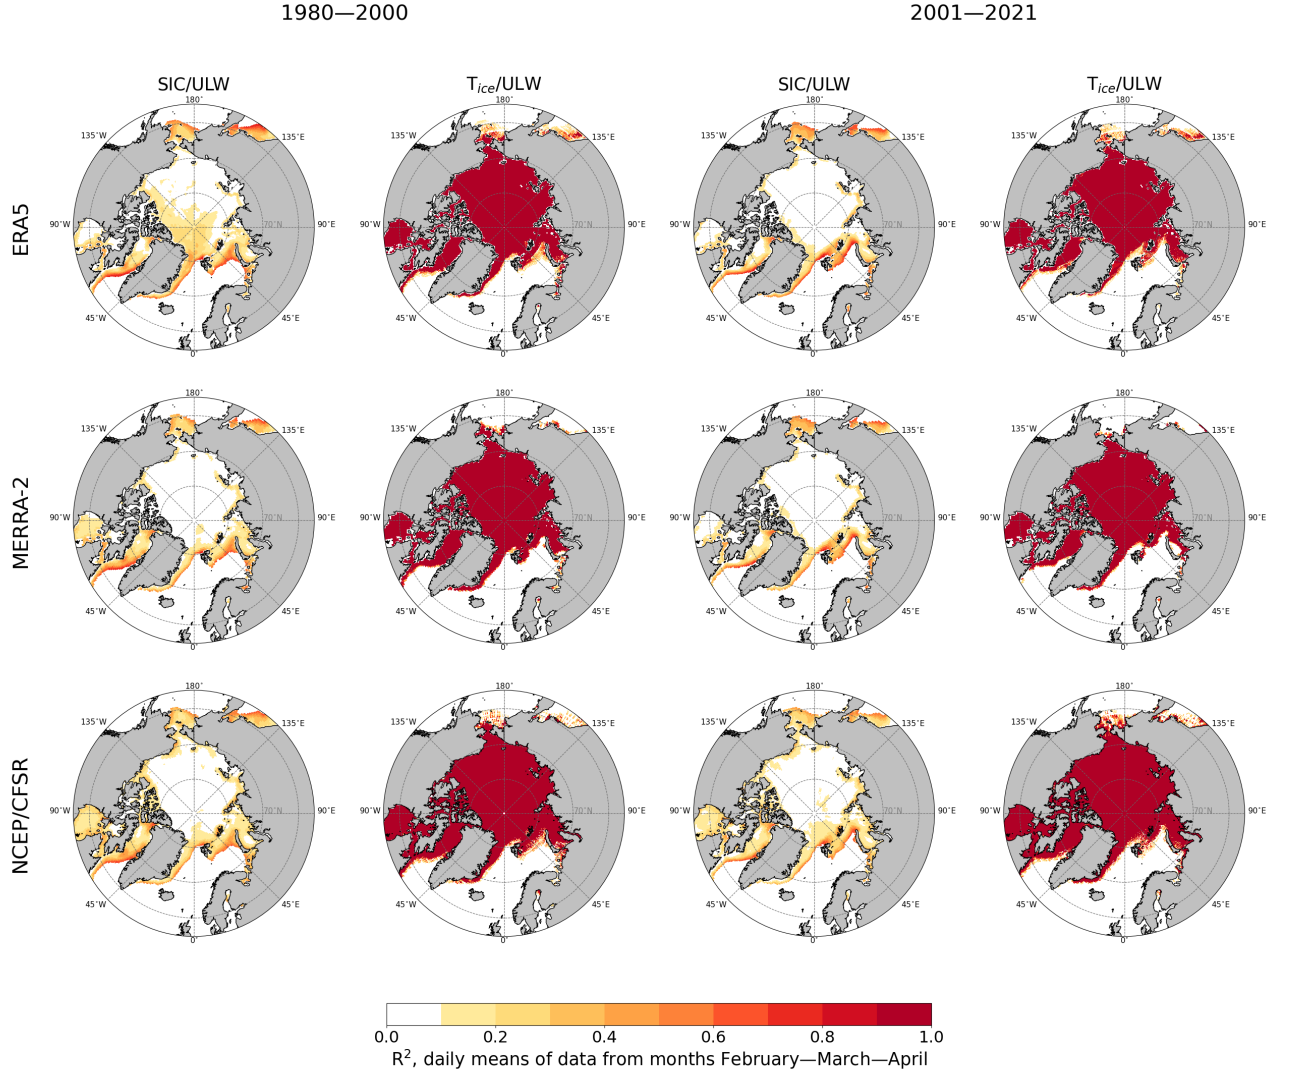

**Figure S 5:** Proportion of variance in the upward longwave radiation (ULW) explained by sea-ice concentration (SIC) and surface temperature of the ice ( $T_{ice}$ ) in February–March–April, 1980–2000 and 2001–2021 (columns), as represented in three reanalyses (rows), based on linear ordinary-least-square regression model (coefficient of determination,  $R^2$ ) using daily means of data from ERA5, MERRA-2, and NCEP/CFSR. Only grid cells with a mean of SIC > 0.5 were considered and only statistically significant results at the 5 % level of significance are shown (insignificant masked in white).

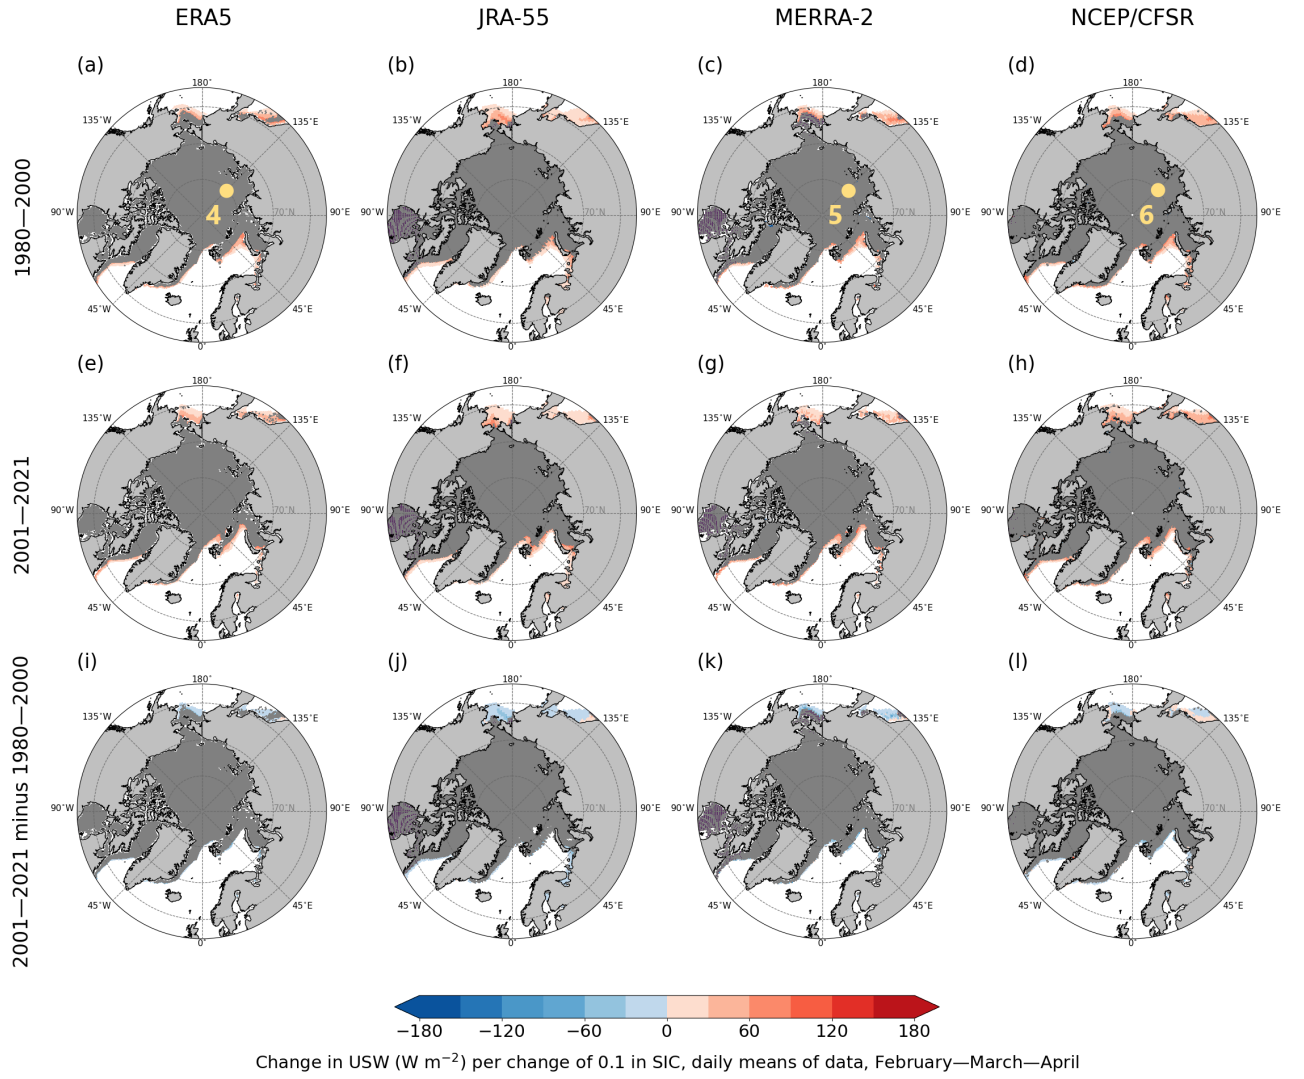

**Figure S 6:** Change in upward shortwave radiative flux ( $\text{W m}^{-2}$ ) per 0.1 change in sea-ice concentration (slope of regression line) in four reanalyses (columns), marine Arctic, February–March–April, based on the linear orthogonal-distance-regression (ODR) model. Dark grey indicates areas where the ODR model did not converge; in panels (i)–(l), dark grey shows these areas in 1980–2000 and/or 2001–2021. Only grid cells with a mean of SIC > 0.5 were considered, and only the slopes whose 95 % confidence intervals do not overlap zero are shown (others masked in white). Points 4, 5, 6 (in yellow) from panels (a), (c), (d) are further analysed in Figure S7.

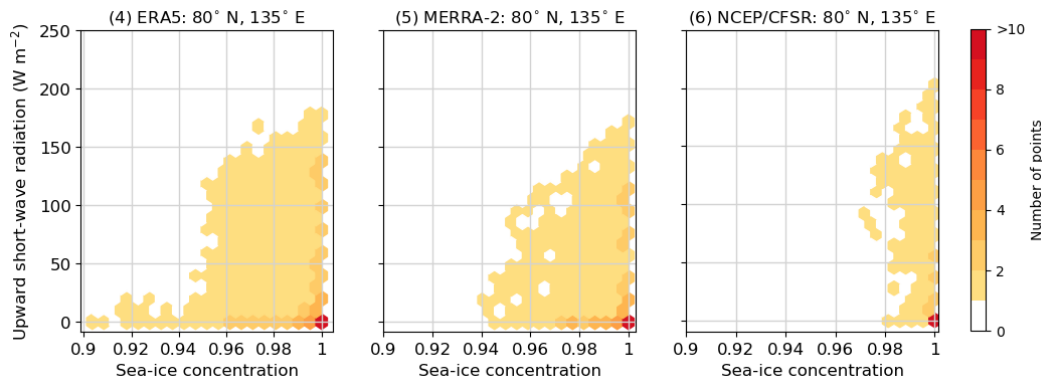

**Figure S 7:** Daily sea-ice concentration and upward shortwave radiative flux in selected grid cells in the Laptev Sea, where the orthogonal-distance-regression model did not converge. Data from ERA5 (4), MERRA-2 (5), and NCEP/CFSR (6) (as indicated in Figure S6 in panels (a), (c), (d)), grid cells nearest to  $80^\circ \text{ N}$ ,  $135^\circ \text{ E}$ , days in February–March–April 1980–2000 (1875 days).

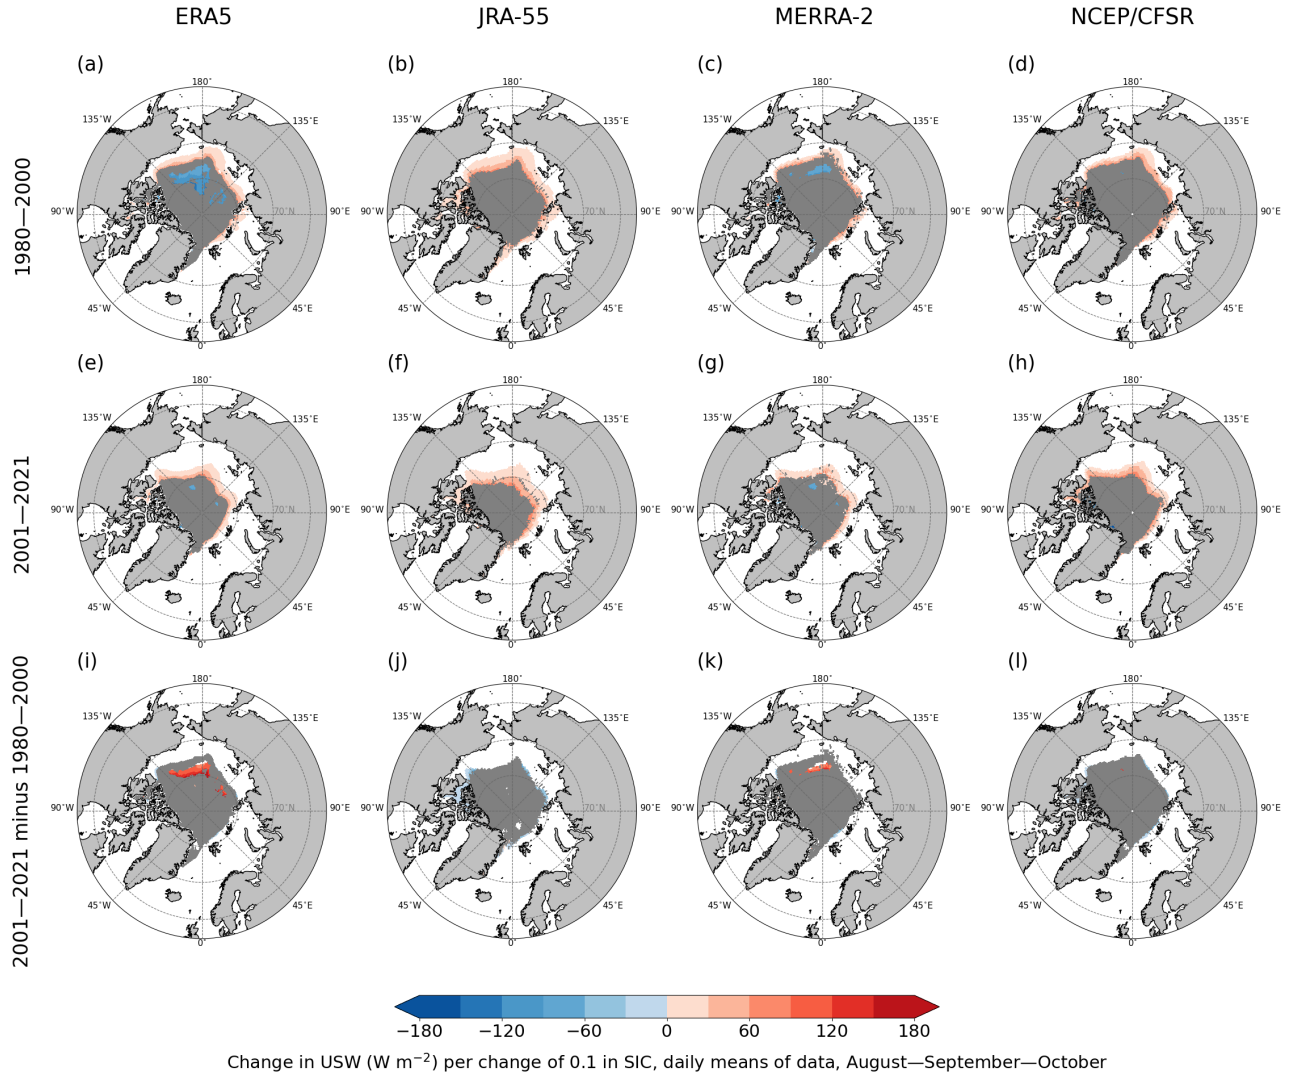

**Figure S 8:** Change in upward shortwave radiative flux ( $\text{W m}^{-2}$ ) per 0.1 change in sea-ice concentration (slope of regression line) in four reanalyses (columns), marine Arctic, August–September–October, based on the linear orthogonal-distance-regression (ODR) model. Dark grey indicates areas where the ODR model did not converge; in panels (i)–(l), dark grey shows these areas in 1980–2000 and/or 2001–2021. Only grid cells with a mean of SIC > 0.5 were considered, and only the slopes whose 95 % confidence intervals do not overlap zero are shown (others masked in white).

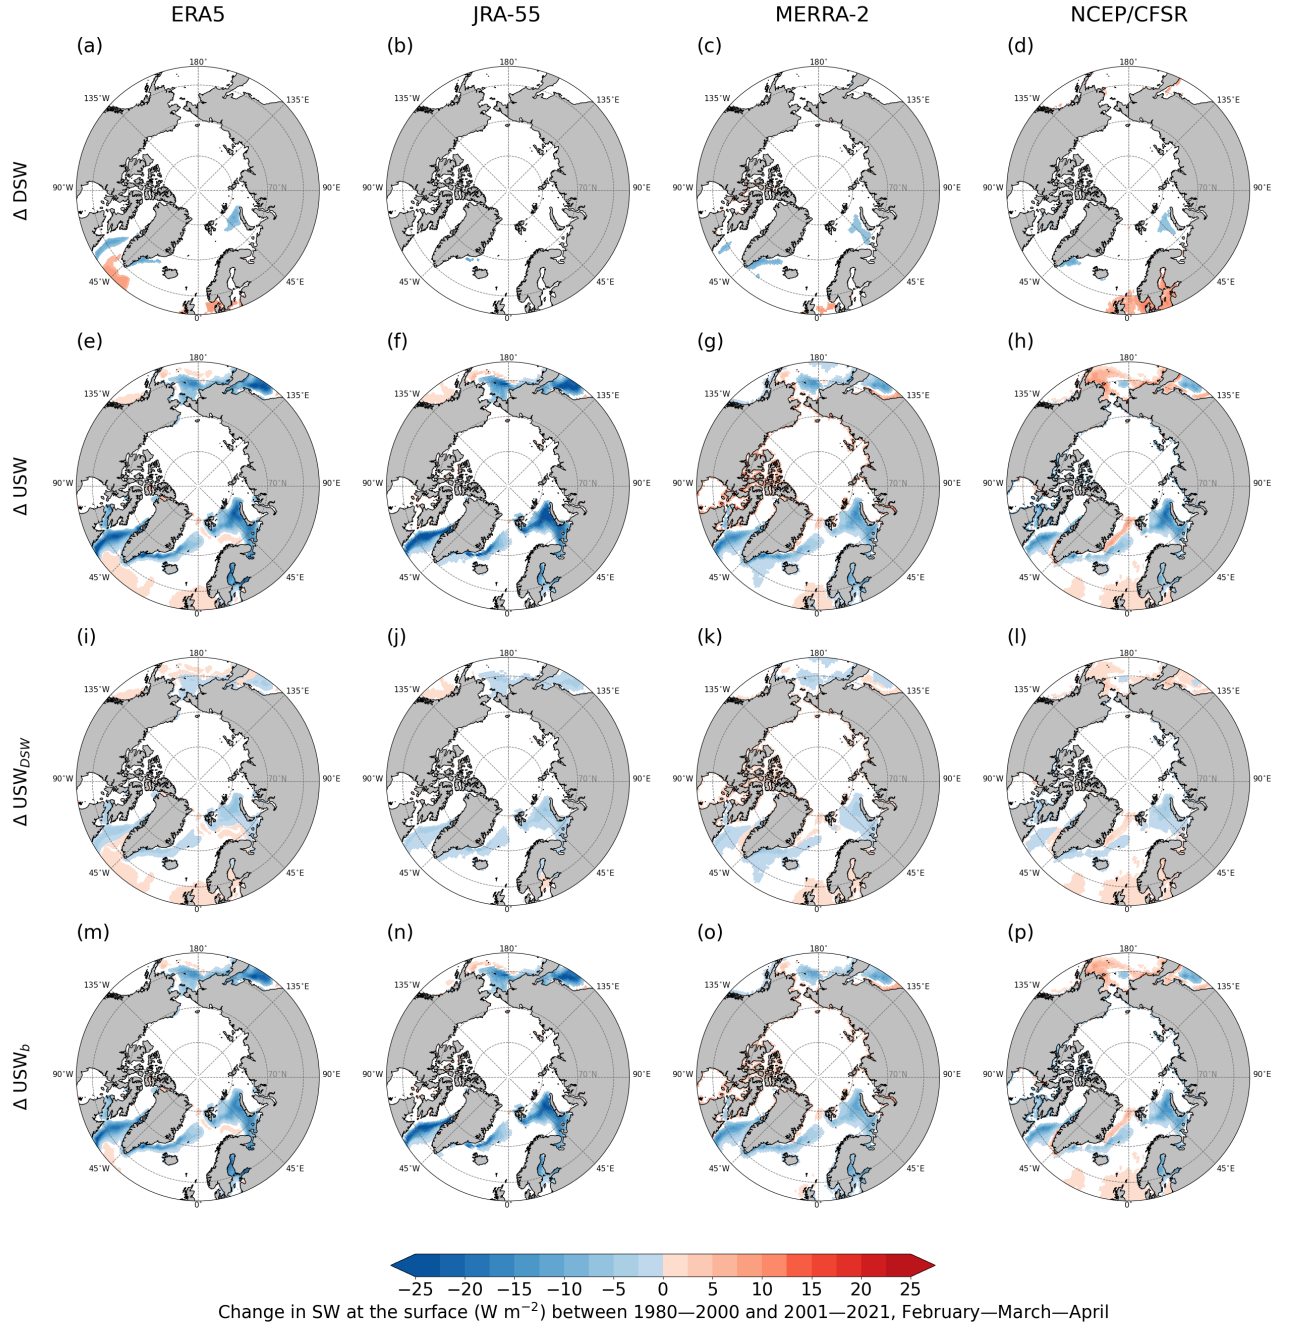

**Figure S 9:** Changes in decadal means (calculated from daily means) between 1980–2000 and 2001–2021, February–March–April. Panels (a)–(h) show changes in surface downward and upward shortwave radiative fluxes ( $\Delta DSW$ ,  $\Delta USW$ ), panels (i)–(l) show changes in USW explained by changes in DSW ( $\Delta USW_{DSW}$ ), and panels (m)–(p) changes in USW explained by changes in albedo ( $\Delta USW_b$ ). Only statistically significant results at the 5 % level of significance are shown (insignificant masked in white); statistically significant grid cells for  $\Delta USW$ ,  $\Delta USW_{DSW}$ , and  $\Delta USW_{DSW}$  are identical. Values within an interval  $(-0.1, 0.1) W m^{-2}$  are also masked in white.

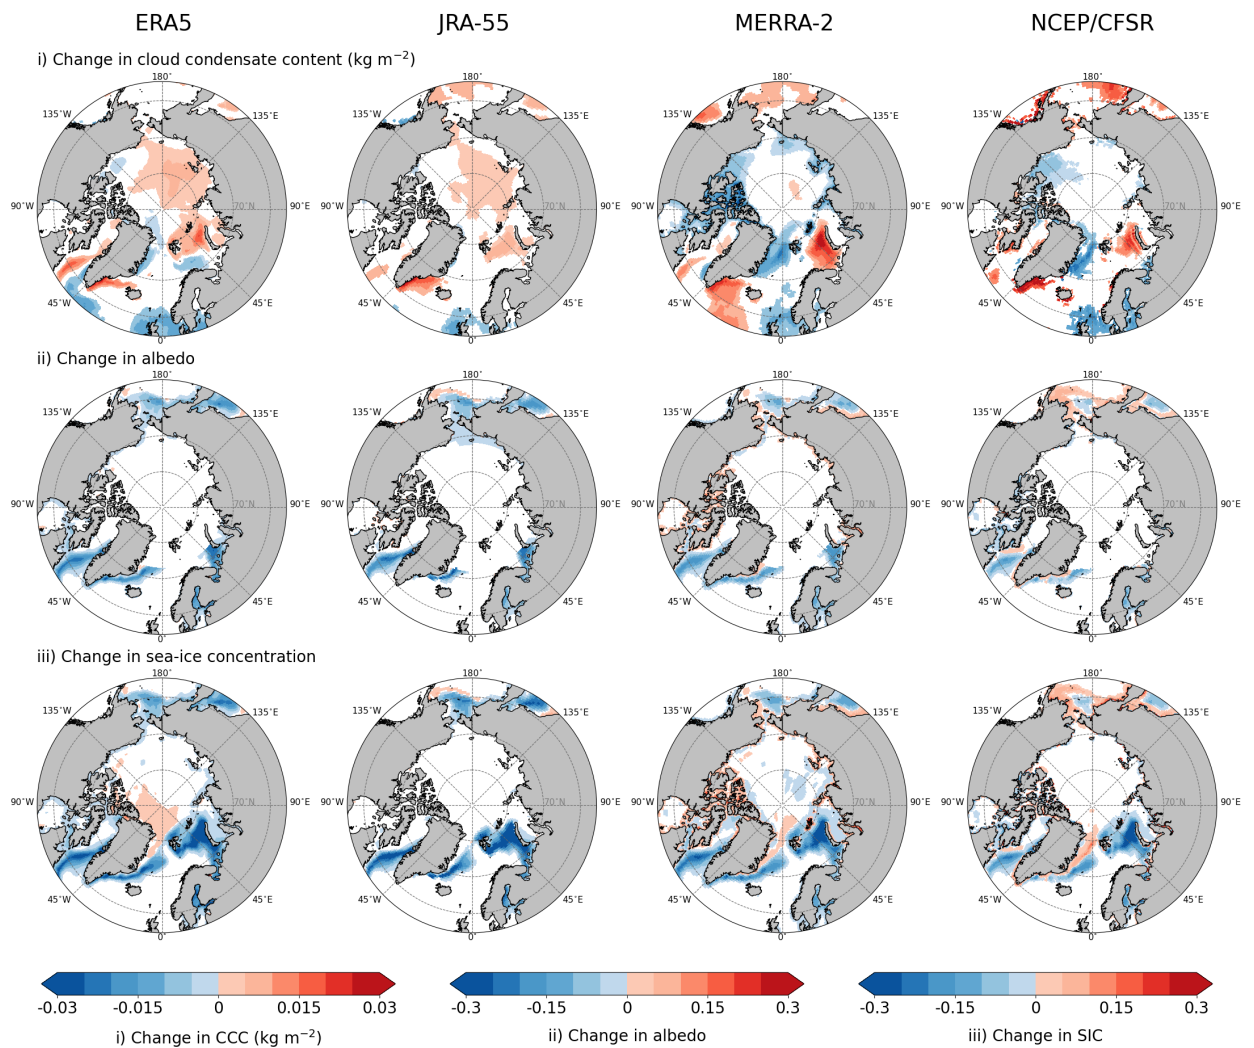

**Figure S 10:** Changes in decadal means (calculated from daily means) 2001–2021 minus 1980–2000, February–March–April. Row (i) shows cloud condensate content (CCC, vertically integrated cloud liquid water + ice), row (ii) shows surface albedo, and row (iii) sea-ice concentration (SIC). Only statistically significant results at the 5 % level of significance are shown (insignificant masked in white). In rows (ii) and (iii), values within an interval  $(-0.01, 0.01)$  are also masked in white.

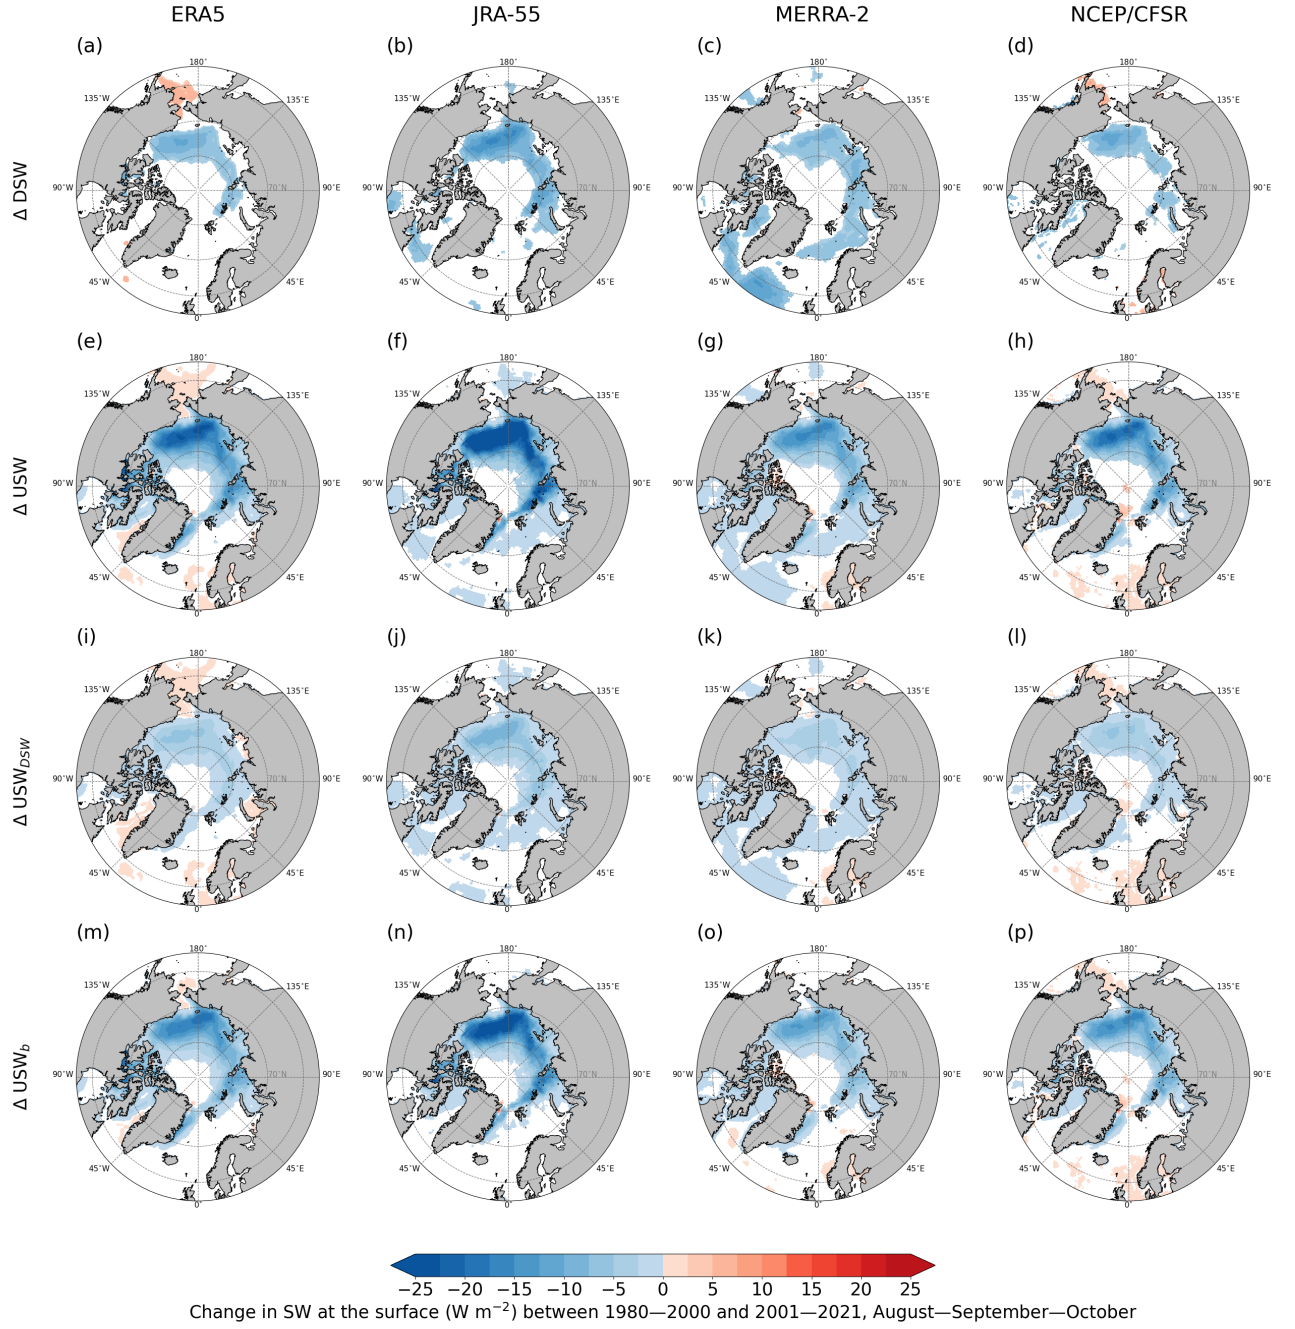

**Figure S 11:** Changes in decadal means (calculated from daily means) between 1980–2000 and 2001–2021, August–September–October. Panels (a)–(h) show changes in surface downward and upward shortwave radiative fluxes ( $\Delta DSW$ ,  $\Delta USW$ ), panels (i)–(l) show changes in USW explained by changes in DSW ( $\Delta USW_{DSW}$ ), and panels (m)–(p) changes in USW explained by changes in albedo ( $\Delta USW_b$ ). Only statistically significant results at the 5 % level of significance are shown (insignificant masked in white); statistically significant grid cells for  $\Delta USW$ ,  $\Delta USW_{DSW}$ , and  $\Delta USW_b$  are identical. Values within an interval  $(-0.1, 0.1) W m^{-2}$  are also masked in white.

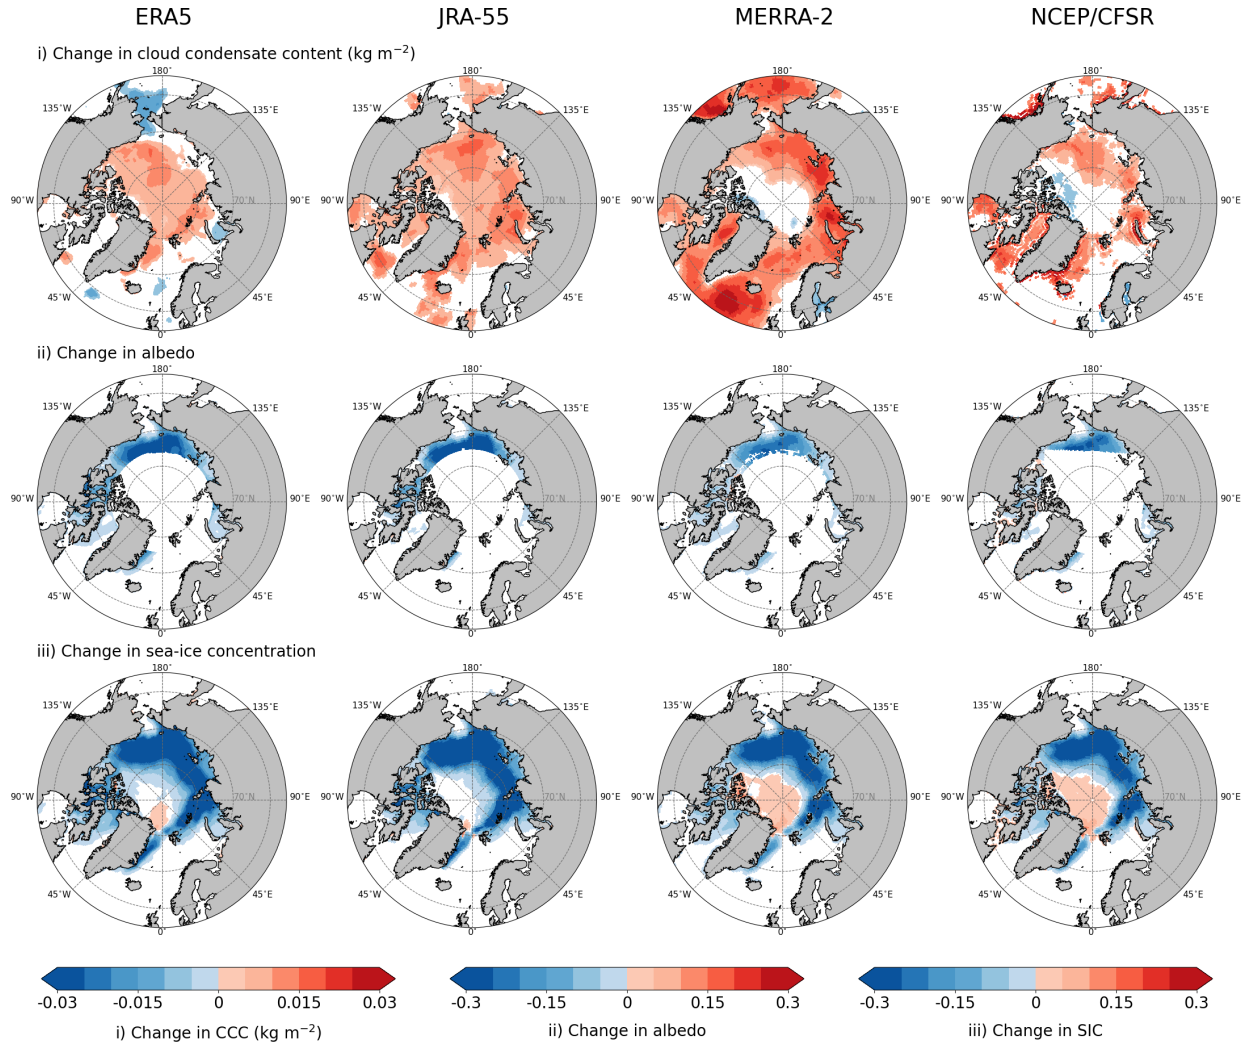

**Figure S 12:** Changes in decadal means (calculated from daily means) 2001–2021 minus 1980–2000, August–September–October. Row (i) shows cloud condensate content (CCC, vertically integrated cloud liquid water + ice), row (ii) shows surface albedo, and row (iii) sea-ice concentration (SIC). Only statistically significant results at the 5 % level of significance are shown (insignificant masked in white). In rows (ii) and (iii), values within an interval (-0.01,0.01) are also masked in white.
